# Supplementary figures and images for: A Myc–microRNA network promotes exit from quiescence by suppressing the interferon response and cell-cycle arrest genes
Source: PubMed Central journal article supplement — Nucleic Acids Res. 2013 Jan 7;41(4):2239–54. doi: 10.1093/nar/gks1452 (PMC3575845; doi:10.1093/nar/gks1452), 2013-01-07

Figure S1

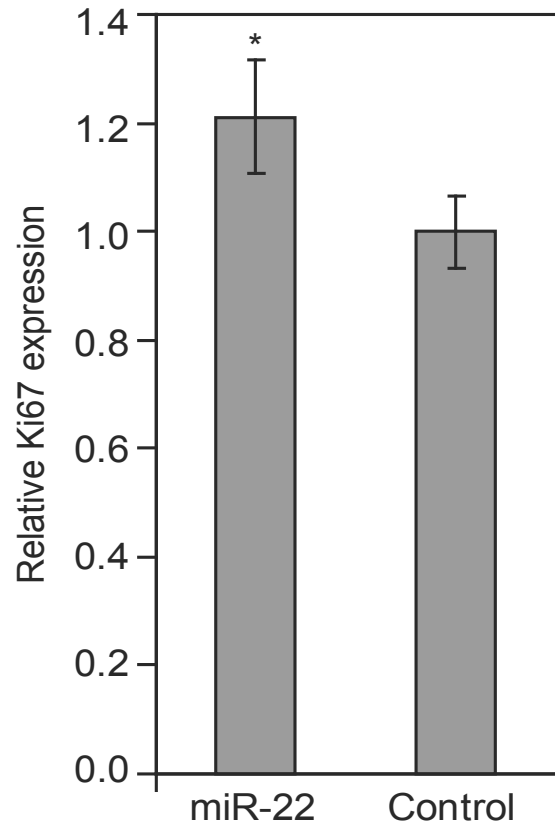

Figure S2

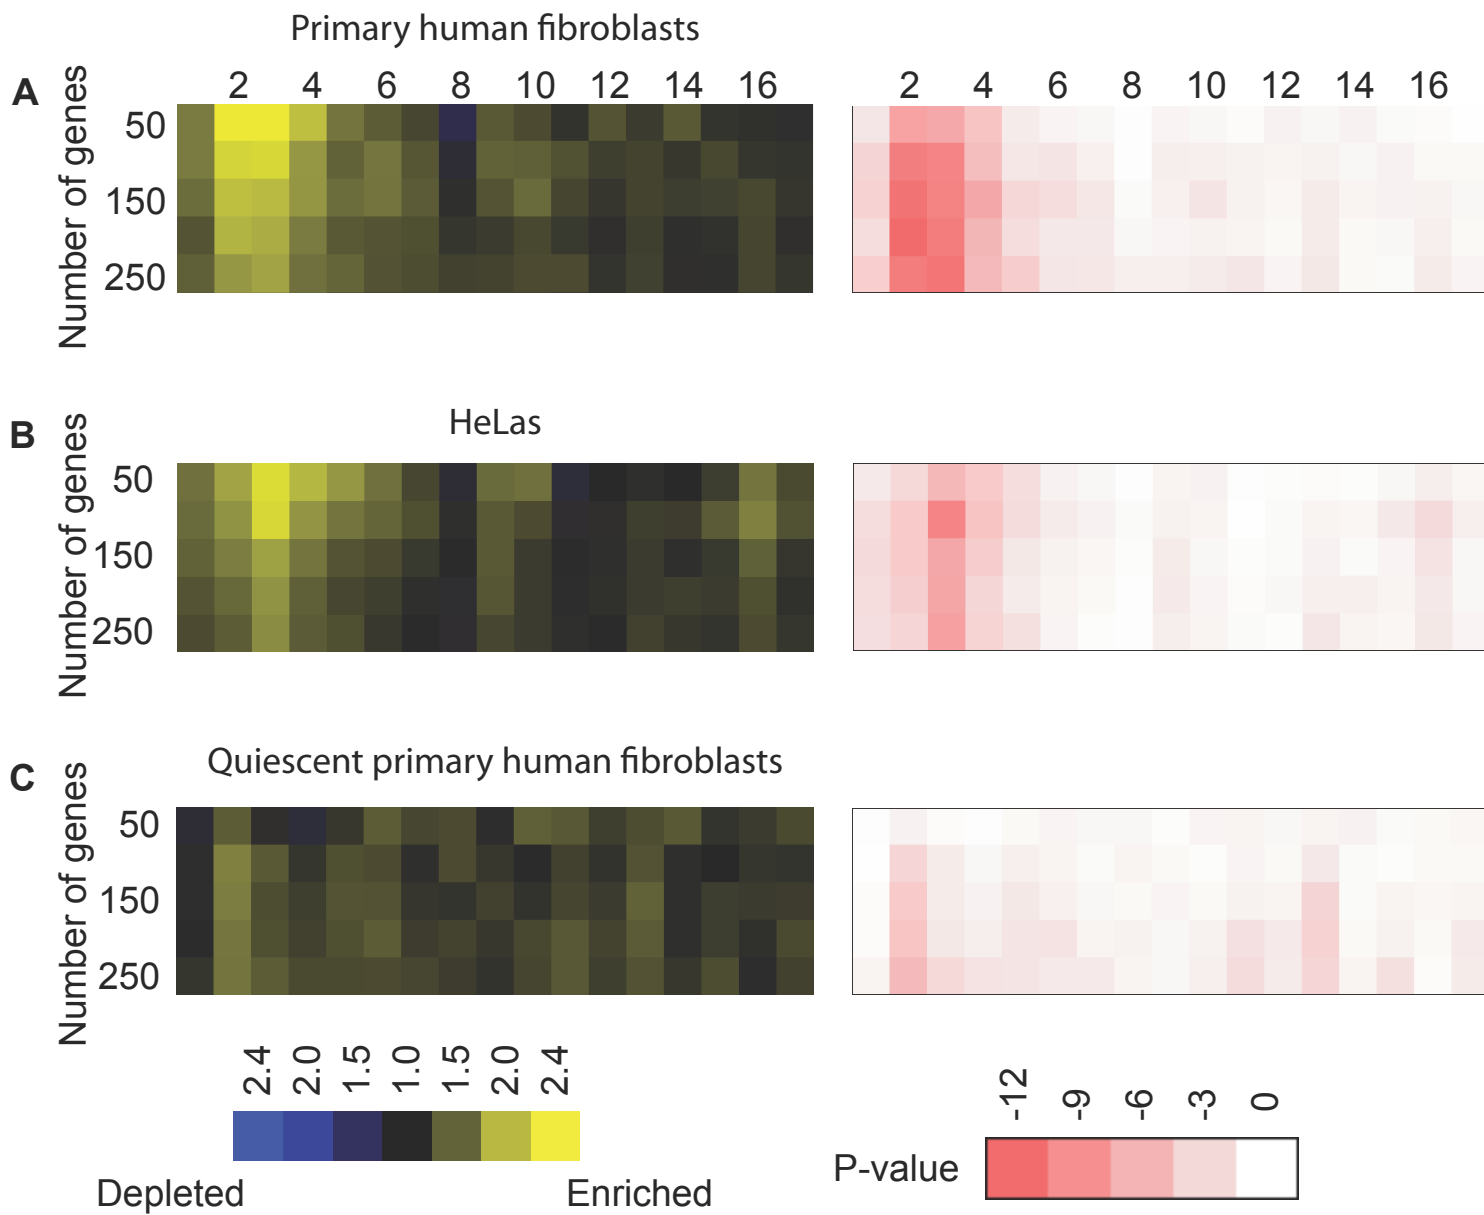

Figure S3

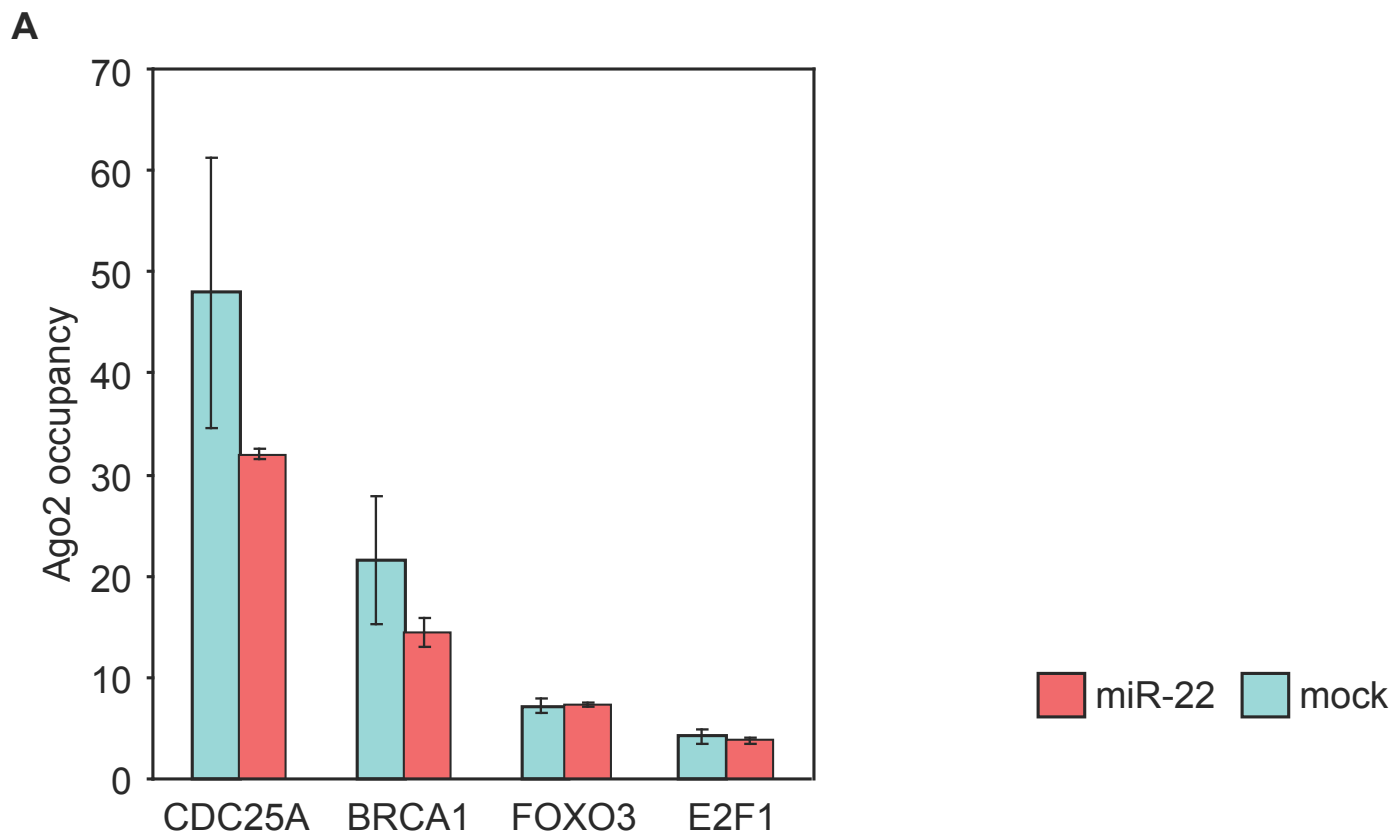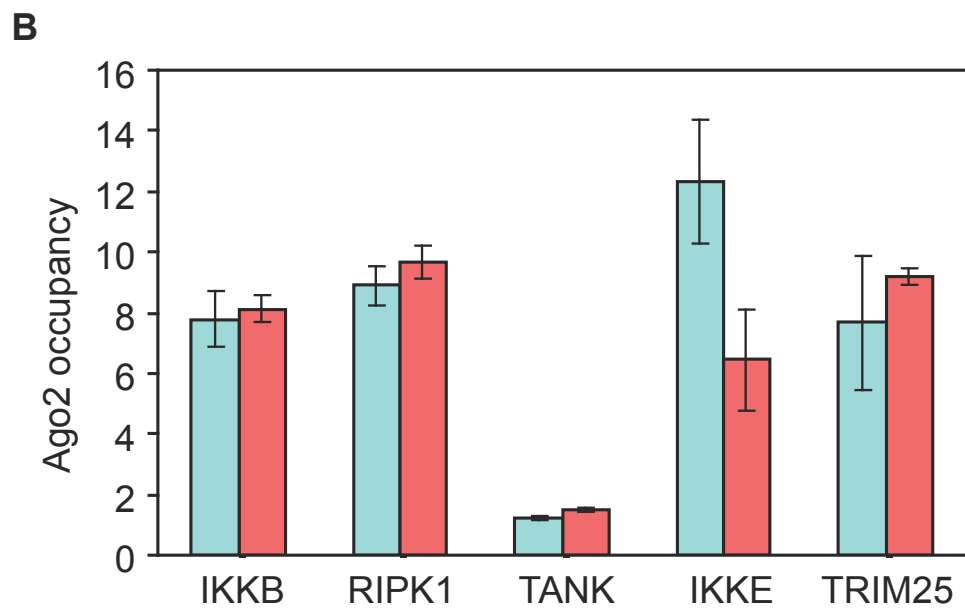

Figure S4

**A**

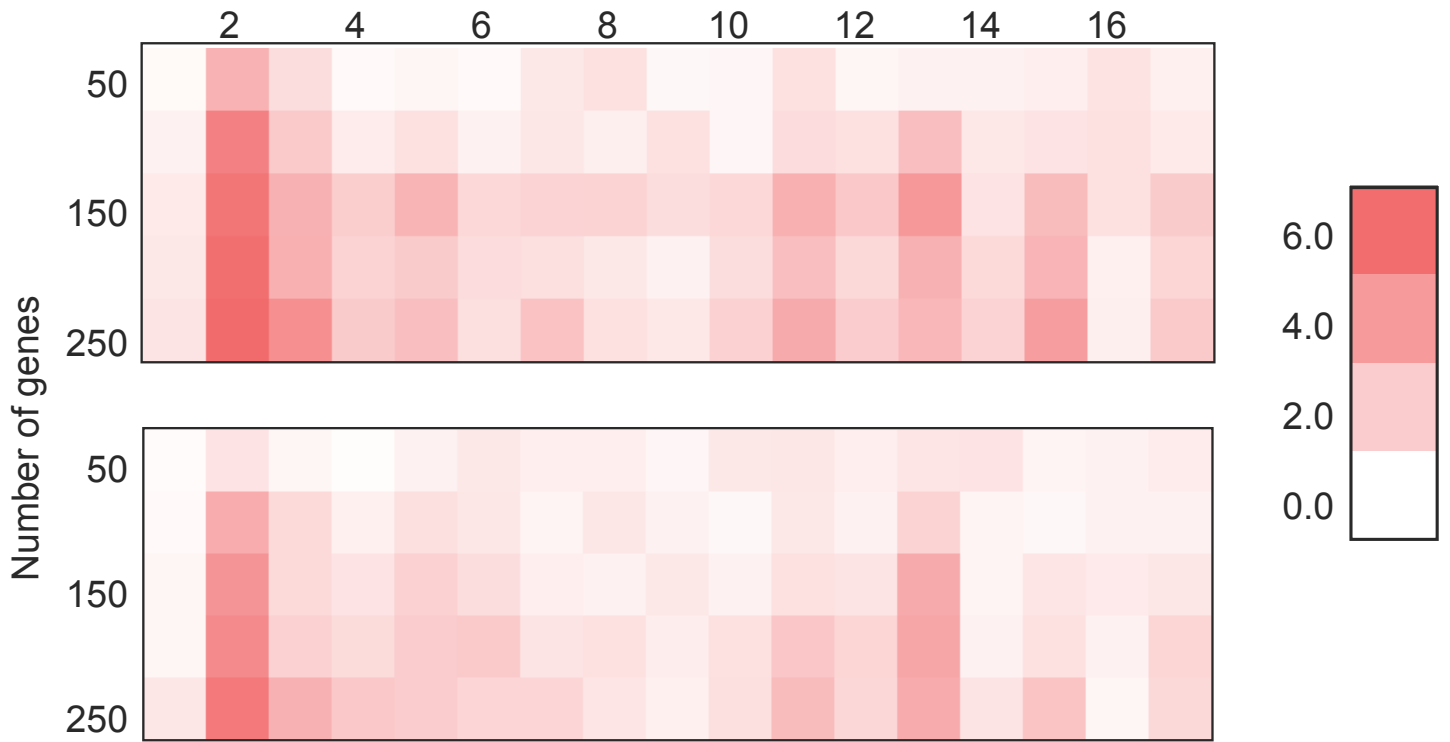

**B**

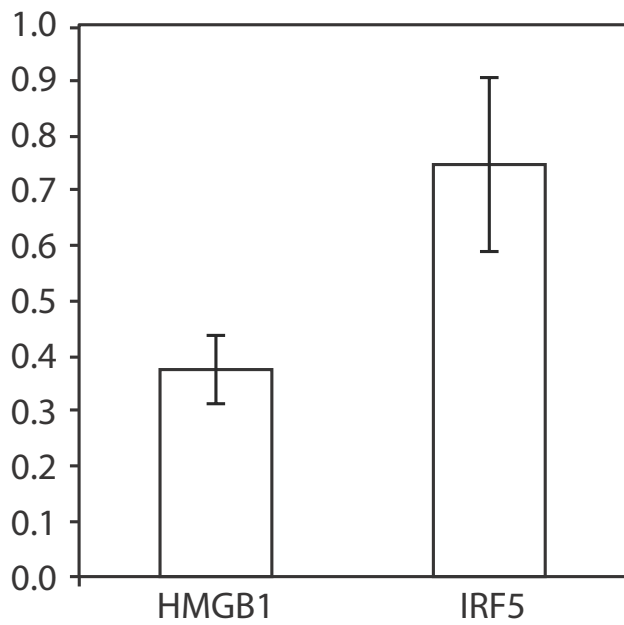

Figure S5

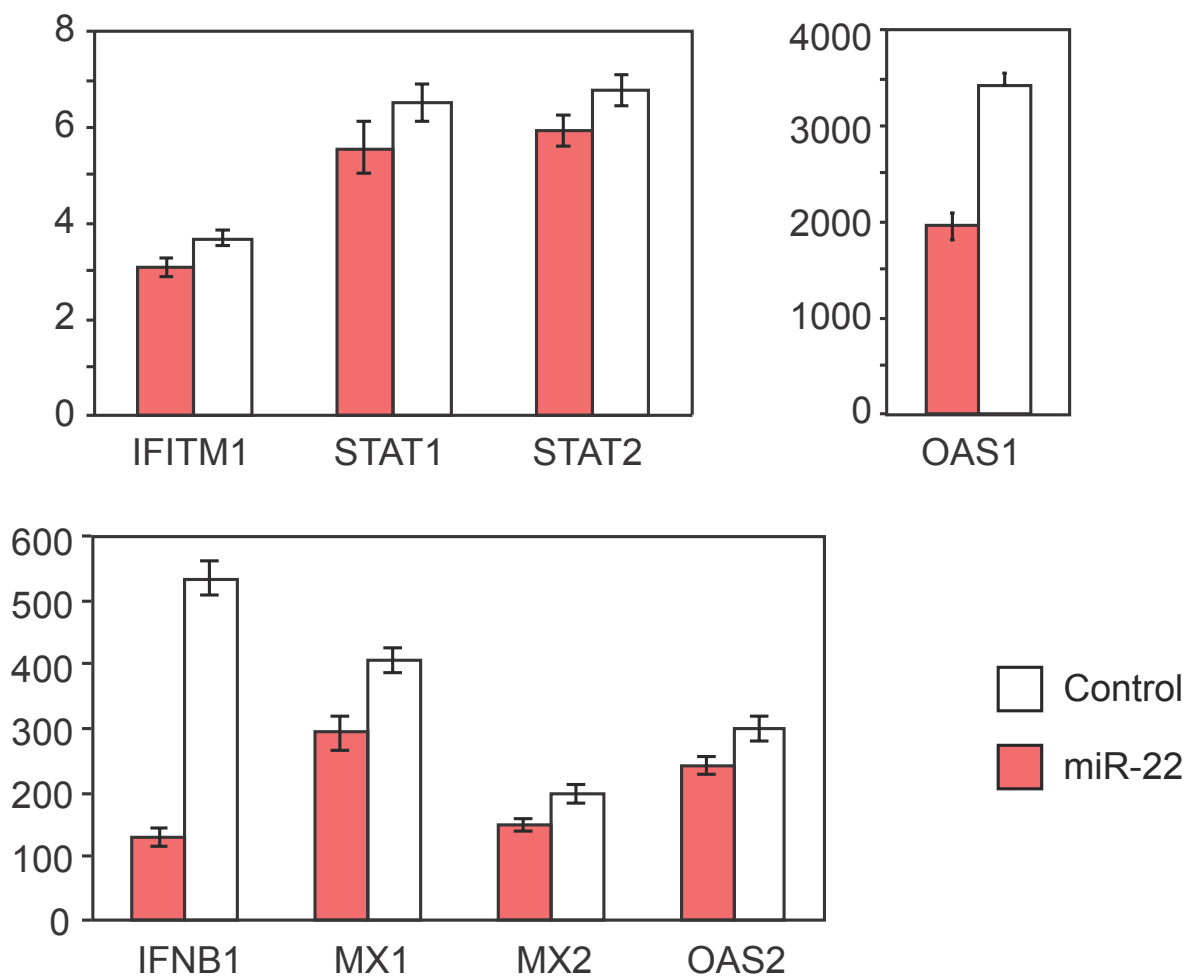

Figure S6

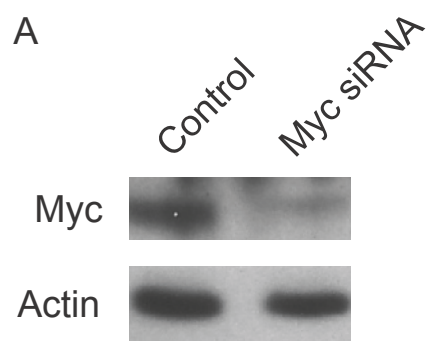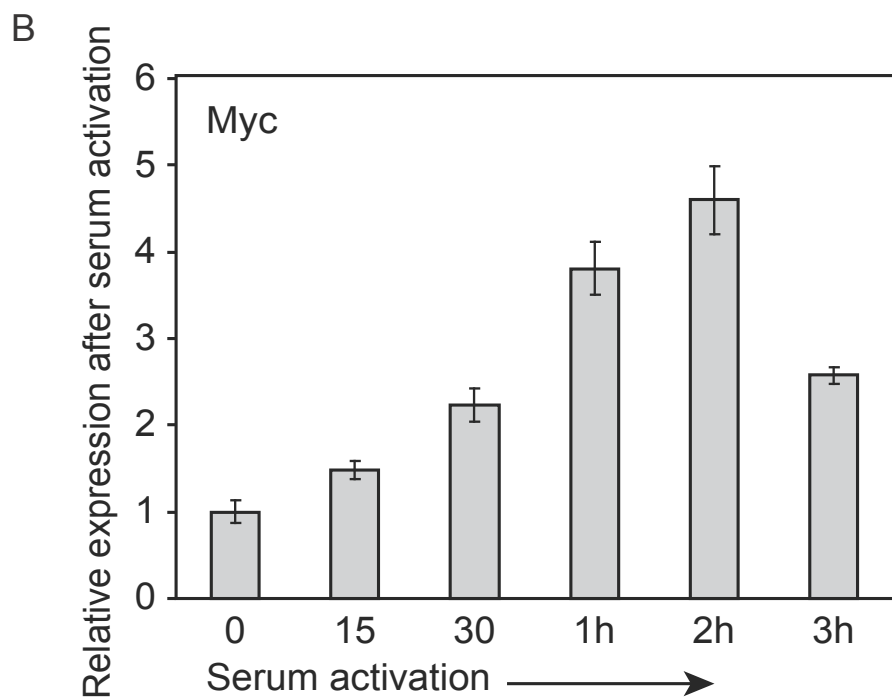

Figure S7

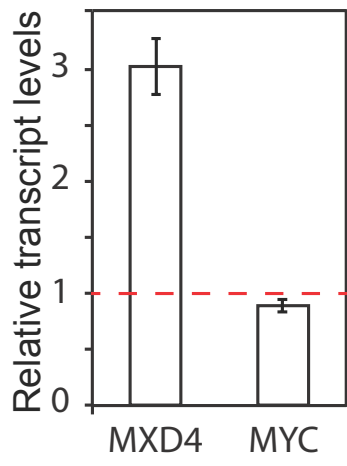

Supplement: supp_gks1452_nar-01383-a-2012-File010.pdf [file supp_gks1452_nar-01383-a-2012-File010.pdf]
